# Supplementary material
Source: PubMed Central journal article supplement (PMC1783817)
Supplement: JCI0729539sd.pdf [file JCI0729539sd.pdf]

Supplemental Fig. 1

a.

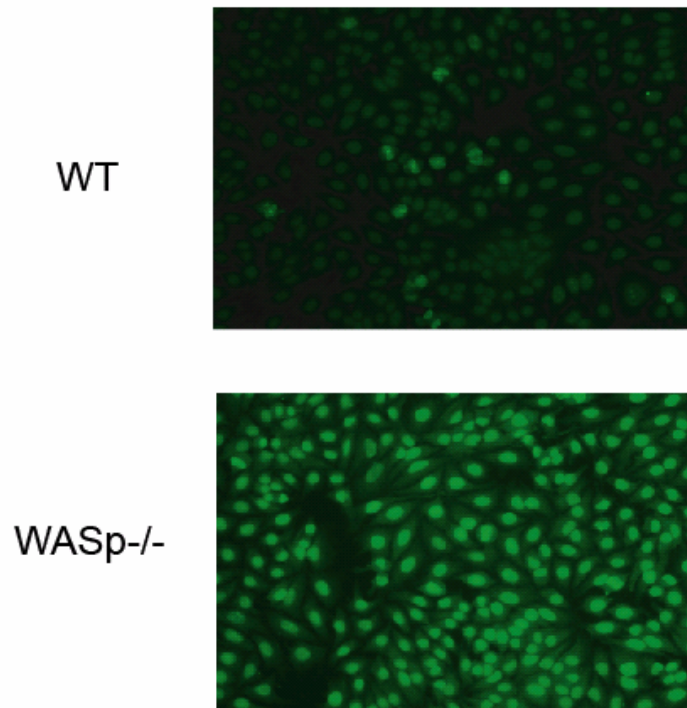

b.

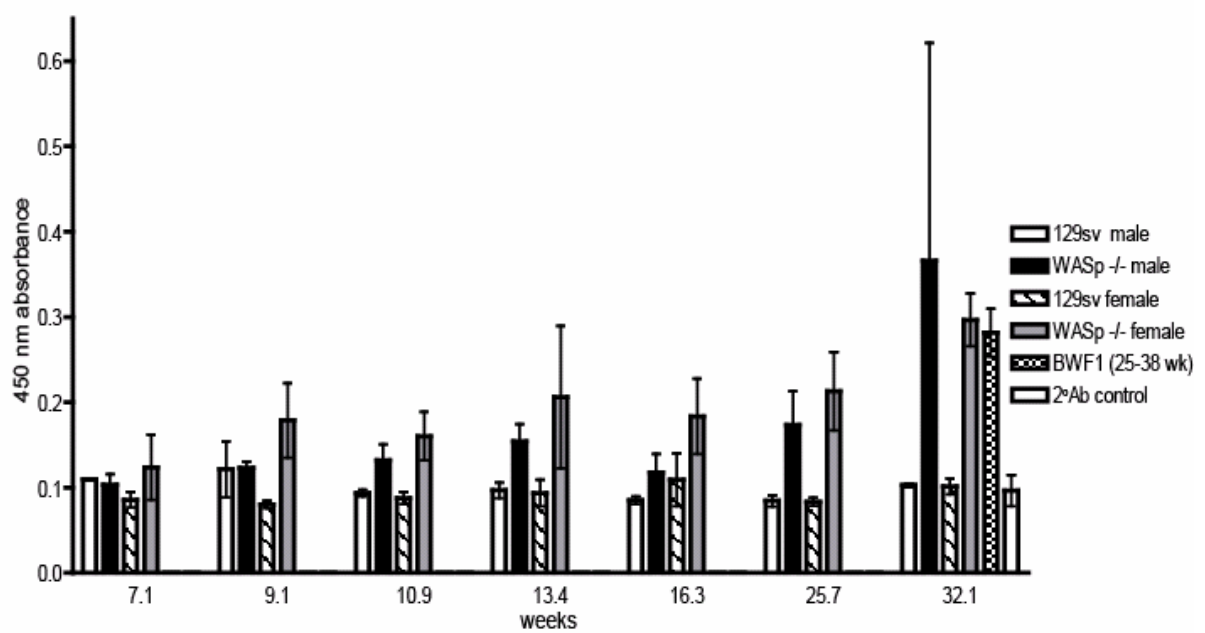

Supplemental Fig. 2

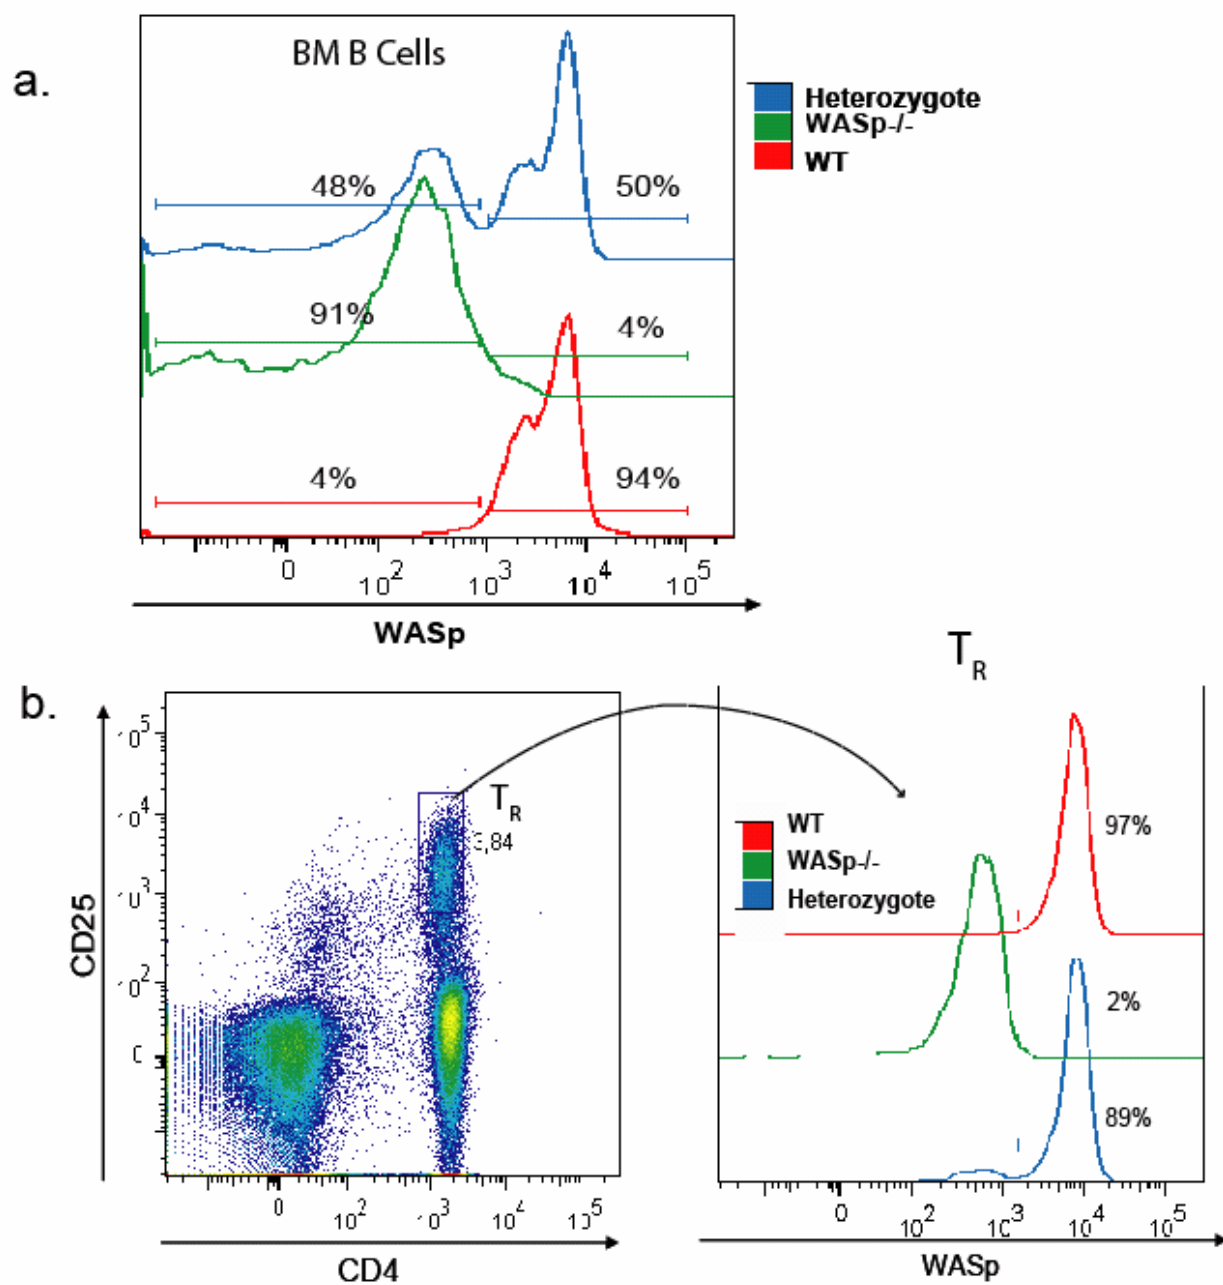

**Supplemental Figure 1. Antinuclear antibodies in WASp<sup>-/-</sup> mice.**

(a) Example of antinuclear antibodies in WASp<sup>-/-</sup> mice (129 strain) evaluated using a Hep2 cell-based immunofluorescence microscopy assay.

(b) WASp<sup>-/-</sup> cohorts (as in Figure 2a) were also evaluated for IgG anti-histone antibodies by ELISA; and compared to sex and age matched WT mice. Sera from a cohort of 25-38 wk old BWF1 mice were used as positive controls (error bars represent standard deviation).

**Supplemental Figure 2. WASp expression in BM B lineage cells and T<sub>R</sub> in WT, heterozygote, and WASp<sup>-/-</sup> mice.**

(a) Bone marrow cells from age matched WT, WASp<sup>-/-</sup> and WASp<sup>+/-</sup> (Heterozygote) B6 mice were stained with B220/WASp to identify B lineage progenitors. Overlay of histograms for WASp staining within the B220<sup>+</sup> population is shown. The relative percentage of WASp<sup>+</sup> vs. WASp<sup>-</sup> cells is indicated. The bimodal peak in WASp<sup>+</sup> cells reflects lower relative WASp expression within pro/pre-B cells (data not shown). Essentially identical percentages of WASp<sup>+</sup> cells were observed in analysis of Gr-1<sup>+</sup>Mac-1<sup>+</sup> myeloid cells (not shown). Representative data from 1 of 3 experiments is shown.

(b) Peripheral LN cells were stained with CD3/CD4/CD69/CD25/WASp. *Left panel.* T<sub>R</sub> population (identified based upon relative CD4/CD25 expression within the CD3<sup>+</sup>/CD69<sup>-</sup> population. *Right panel.* Overlay of histograms for the WASp staining within the T<sub>R</sub> population for WT, WASp<sup>-/-</sup> (KO) and WASp<sup>+/-</sup> (Heterozygote) B6 mice. Similar data were obtained using CD4/FoxP3 staining to identify T<sub>R</sub> (see Figure 4a). Representative data from 1 of >7 experiments is shown.
